# Supplementary material for: The Kinetics of the Redox Reaction of Platinum(IV) Ions with Ascorbic Acid in the Presence of Oxygen
Source: MDPI journal article supplement (doi:10.3390/ma16134630), 2023-06-27
Supplement: s1 [file s1]

## Supplementary Materials

# The Kinetics of the Redox Reaction of Platinum(IV) Ions with Ascorbic Acid in the Presence of Oxygen

Magdalena Luty-Błocho <sup>1,\*</sup>, Aleksandra Szot <sup>1</sup>, Volker Hessel <sup>2</sup> and Krzysztof Fitzner <sup>1</sup>

<sup>1</sup> Faculty of Non-Ferrous Metals, AGH University of Krakow, al. Adama Mickiewicza 30, 30-059 Kraków, Poland; szot@agh.edu.pl (A.S.); fitzner@agh.edu.pl (K.F.)

<sup>2</sup> School of Chemical Engineering, The University of Adelaide, Adelaide 5005, Australia; volker.hessel@adelaide.edu.au

\* Correspondence: mlb@agh.edu.pl; Tel.: +48-12-617-4126

S1. The spectra evolution in the course of the PtNPs formation.

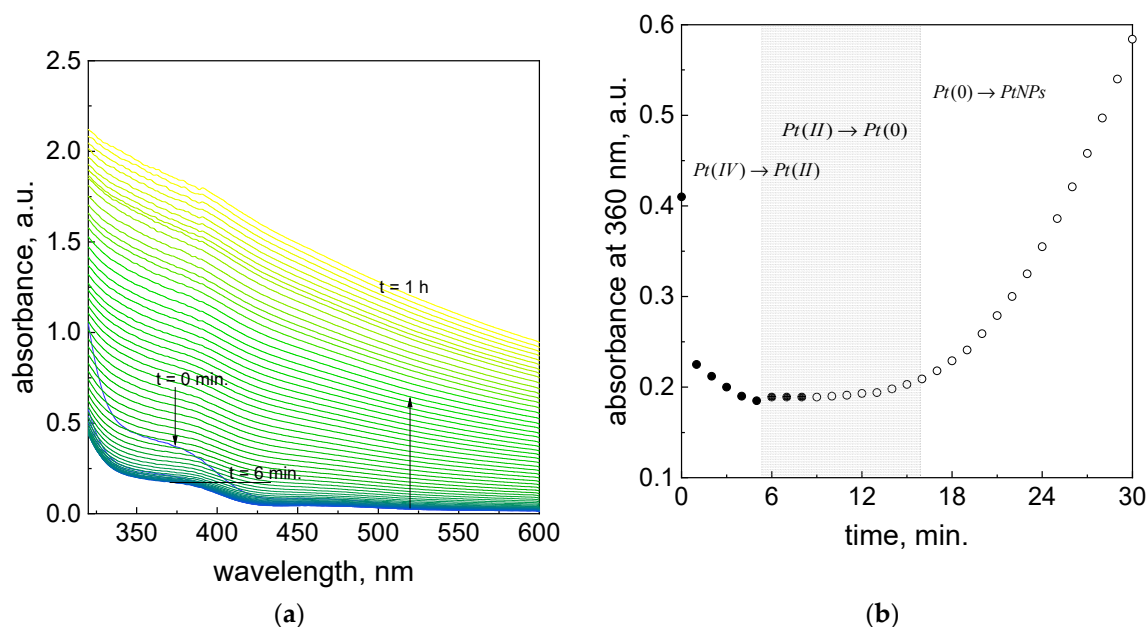

**Figure S1.** The change in the turbidity level characteristic for the process of platinum nanoparticles formation (a), kinetic curve registered at 360 nm (b). Conditions:  $C_{0, Pt(IV)} = 1.0$  mM,  $C_{0, H_2Asc} = 60$  mM, pH =  $2.50 \pm 0.05$ ,  $T = 313 \pm 0.1$  K,  $I = 0.06$  M.

## S2. The Arrhenius and Eyring dependency

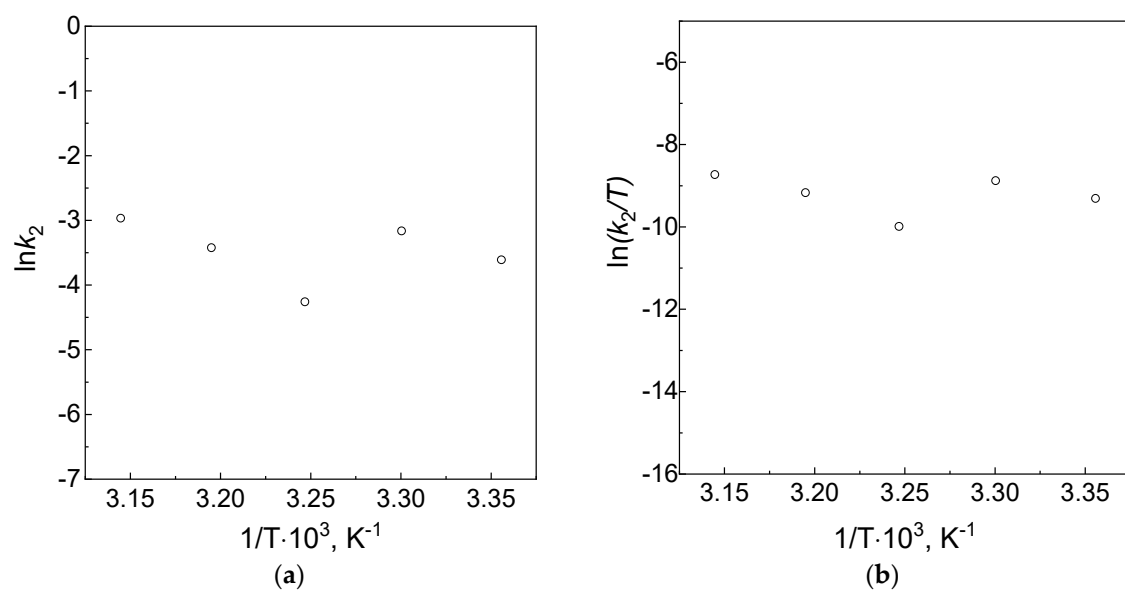

**Figure S2.** Arrhenius (a) and Eyring (b) dependency for reduction of Pt(IV) ions using ascorbic acid. Conditions:  $C_{0,Pt(IV)} = 1.0$  mM,  $C_{0,H_2Asc} = 60$  mM,  $pH = 2.50 \pm 0.05$ ,  $I = 0.06$  M.

## S3. The kinetic curves registered at different pH of the solution.

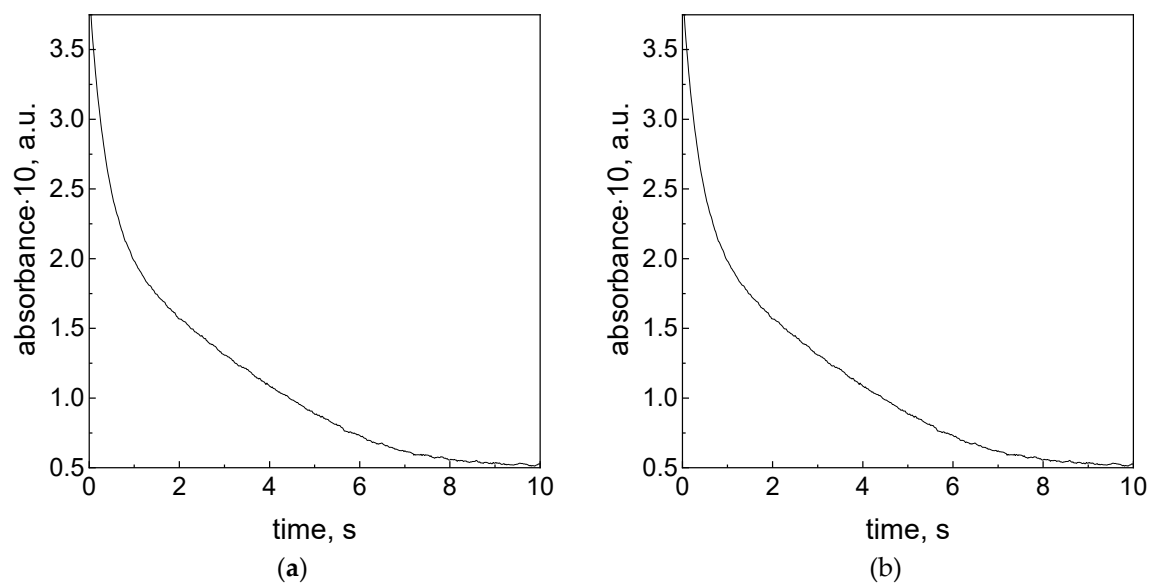

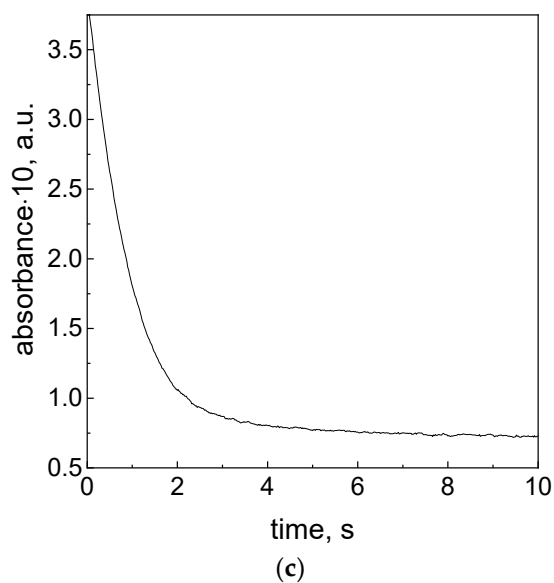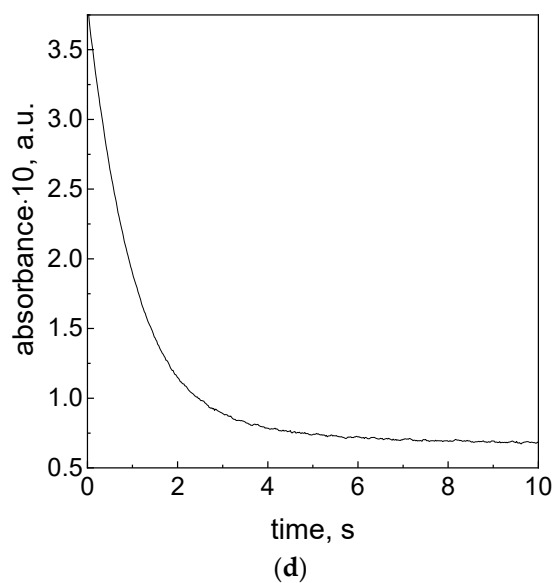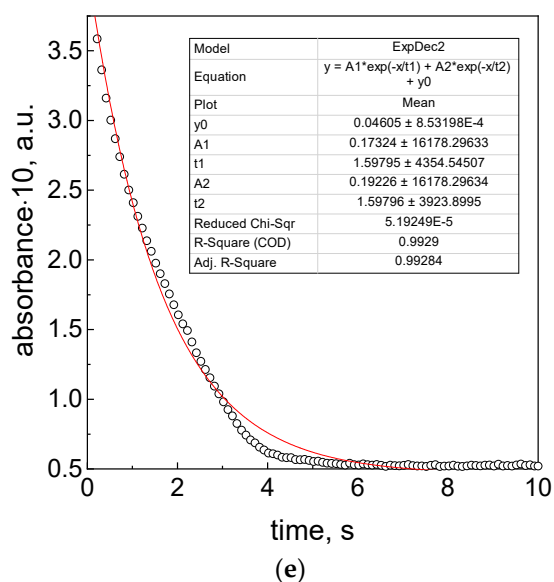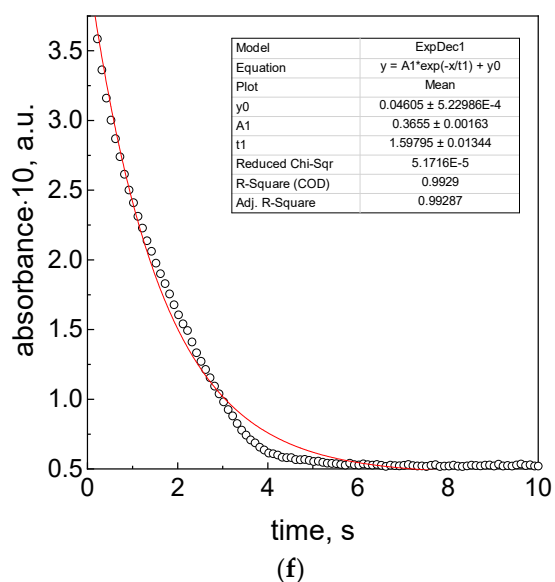

**Figure S3.** The sample of kinetic curves at different pH levels of the solution, registered during Pt(IV) ion reduction using ascorbic acid: pH = 2.15 (a), 3.65 (b), 4.17 (c) and 5.04 (d). The sample of kinetic curve with fitting curve (double exponential (e) and single exponential (f) for reaction carried out at pH = 3.65). Conditions:  $C_{0,Pt(IV)} = 1.0$  mM,  $C_{0,H_2Asc} = 60$  mM,  $T = 313 \pm 0.1$  K,  $I = 0.06$  M.

#### S4. Kinetic curves at different ionic strength

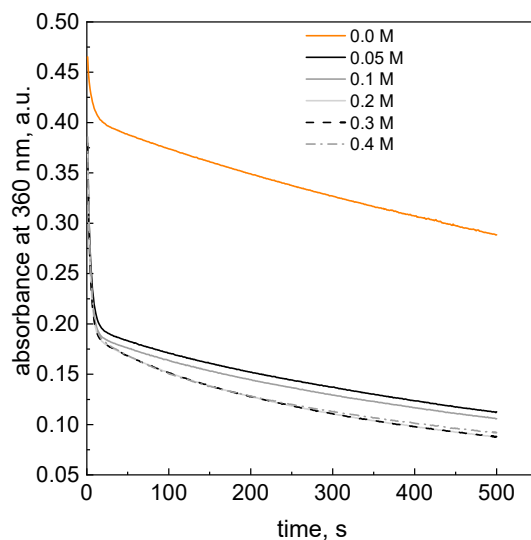

**Figure S4.** The sample of kinetic curve registered during Pt(IV) ion reduction using ascorbic acid. Conditions:  $C_{0,Pt(IV)} = 1.0 \text{ mM}$ ,  $C_{0,H_2Asc} = 60 \text{ mM}$ ,  $T = 313 \pm 0.1 \text{ K}$ ,  $pH = 2.5$ .

#### S5. The influence of chloride concentration on the share of platinum species

**Table S1.** The influence of chloride ions concentration on the share of the platinum species. Conditions:  $C_{0,Pt(IV)} = 1.00 \text{ mM}$ ,  $C_{0,H_2Asc} = 60.0 \text{ mM}$ ,  $[Na^+] = 0.4 \text{ M}$ ,  $T = 313 \pm 0.1 \text{ K}$ ,  $pH = 2.50 \pm 0.5$ ,  $I = 0.4 \text{ M}$ .

| [Cl]<br>M | $y_0 \propto C_{[PtCl_4]^{2-}}$<br>a.u. | $A_1 \propto C_{[PtCl_6]^{2-}}$<br>a.u. | $A_2 \propto C_{[PtCl_5(H_2O)]^-}$<br>a.u. | $C_{[PtCl_4]^{2-}}$ ,<br>mM | $C_{[PtCl_6]^{2-}}$ ,<br>mM | $C_{[PtCl_5(H_2O)]^-}$ ,<br>mM |
|-----------|-----------------------------------------|-----------------------------------------|--------------------------------------------|-----------------------------|-----------------------------|--------------------------------|
| 0.0       | 0.067                                   | 0.18                                    | 0.14                                       | 1.12                        | 0.367                       | 0.285                          |
| 0.05      | 0.025                                   | 0.14                                    | 0.19                                       | 0.446                       | 0.286                       | 0.388                          |
| 0.10      | 0.03                                    | 0.2                                     | 0.16                                       | 0.536                       | 0.408                       | 0.326                          |
| 0.20      | 0.03                                    | 0.25                                    | 0.15                                       | 0.536                       | 0.510                       | 0.306                          |
| 0.30      | 0.04                                    | 0.26                                    | 0.135                                      | 0.714                       | 0.531                       | 0.276                          |
| 0.40      | 0.05                                    | 0.27                                    | 0.13                                       | 0.893                       | 0.551                       | 0.265                          |

$C_{[PtCl_6]^{2-}} = A_1/\epsilon$ ,  $C_{[PtCl_5(H_2O)]^-} = A_2/\epsilon$ ,  $C_{[PtCl_4]^{2-}} = y_0/\epsilon_{Pt(II)}$ , where  $\epsilon = 490 \text{ M}^{-1}\text{cm}^{-1}$ ,  $\epsilon_{Pt(II)} = 56 \text{ M}^{-1}\text{cm}^{-1}$ .

#### S6. The influence of the oxygen on kinetic curves.

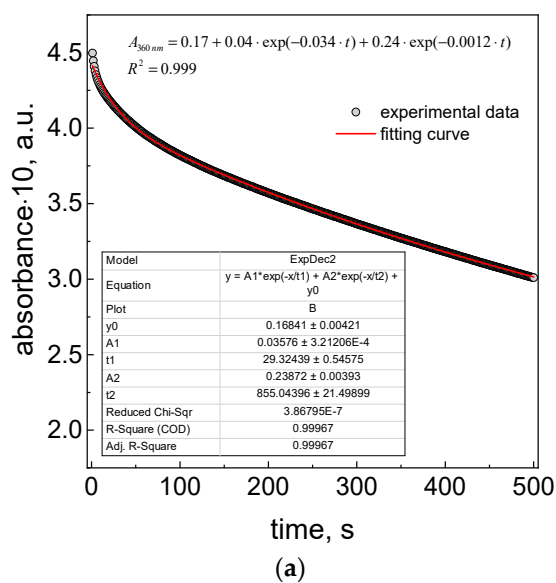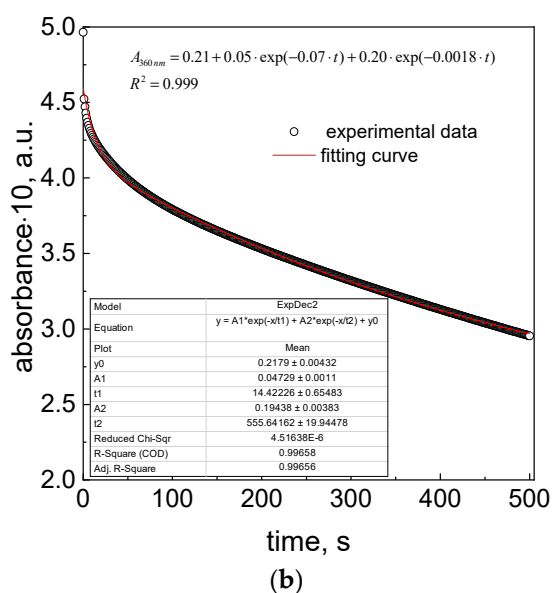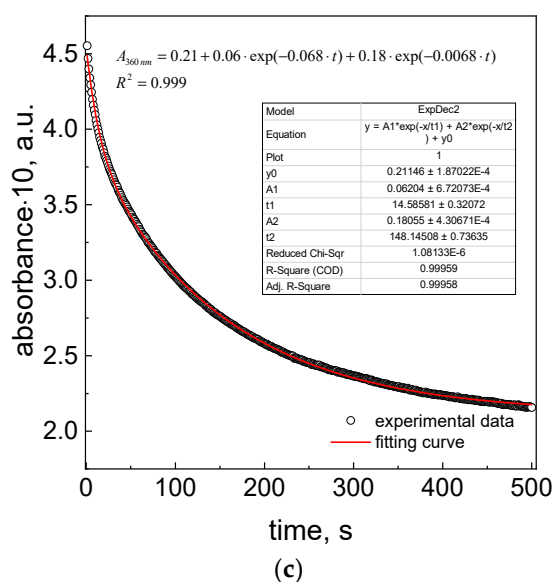

**Figure S5.** The sample of kinetic curve with fitting registered during Pt(IV) ion reduction using ascorbic acid containing oxygen (a,b) and in deaerated solution (c). Conditions:  $C_{0,Pt(IV)} = 1.0$  mM,  $C_{0,H_2Asc} = 60$  mM (a), 2.0 mM (b, c),  $T = 313 \pm 0.1$  K,  $I = 0.06$  M,  $pH = 2.5$ .

**Table S2.** Experimental and calculated values of observed rate constants.

| Solution                | Amount of reductant, mM | $k_{1,obs}$<br>s <sup>-1</sup> | $k_{2,obs}$<br>s <sup>-1</sup> | Degree of dissociation,<br>$\alpha^1$ , % |
|-------------------------|-------------------------|--------------------------------|--------------------------------|-------------------------------------------|
| Contains O <sub>2</sub> | 60 mM                   | 0.034                          | 0.0012                         | 4                                         |
|                         | 2 mM                    | 0.07                           | 0.0018                         | 20                                        |
| Deaerated               | 2 mM                    | 0.068                          | 0.0068                         | 20                                        |

<sup>1</sup>  $\alpha$ , % =  $\alpha \cdot 100\%$ , where  $\alpha = \sqrt{\frac{K_a}{C}}$ , and  $K_a$  – dissociation constant for ascorbic acid ( $K_a = 10^{-pK_a}$ ,  $pK_a = 4.1$ ) and equals  $7.9 \cdot 10^{-5}$ .

S7. Sample of kinetic curves registered at different wavelength

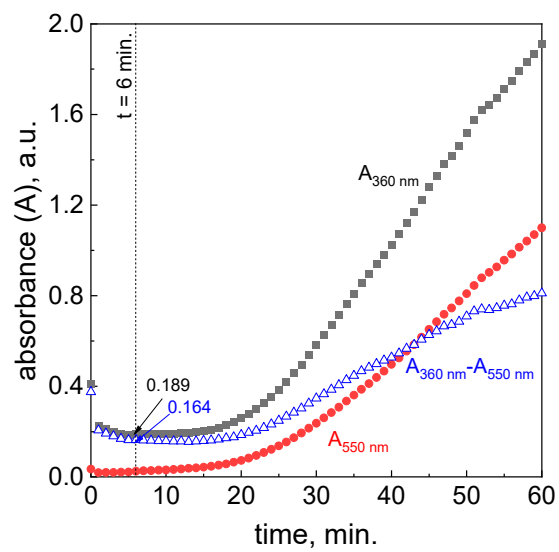

**Figure S6.** The sample of kinetic curves registered at two wavelength for process of Pt(IV) ion reduction using ascorbic acid and kinetic curve containing correction related to turbidity level ( $A_{360\text{ nm}} - A_{550\text{ nm}}$ ). Conditions:  $C_{0,\text{Pt(IV)}} = 1.0\text{ mM}$ ,  $C_{0,\text{H2Asc}} = 60\text{ mM}$ ,  $T = 313 \pm 0.1\text{ K}$ ,  $I = 0.06\text{ M}$ ,  $\text{pH} = 2.5$ .
